# Supplementary material
Source: PubMed Central journal article supplement (PMC4403171)
Supplement: pnas.201501989SI.pdf [file pnas.201501989SI.pdf]

# Supporting Information

Bye et al. 10.1073/pnas.1501989112

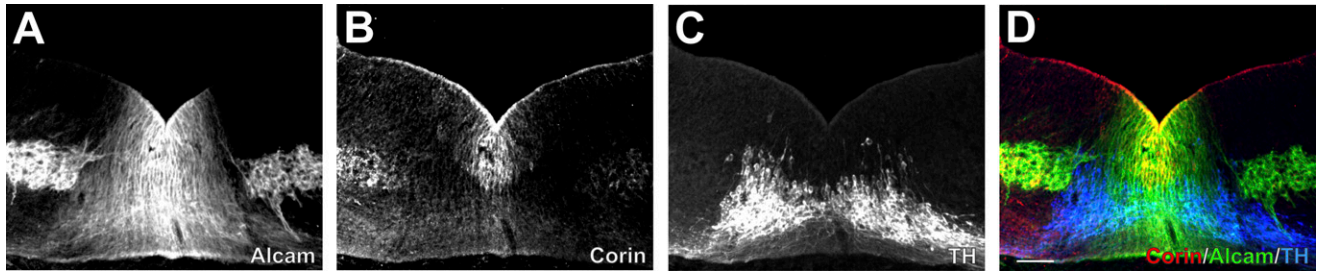

Fig. S1. Immunohistochemistry in E12.5 mouse VM shows the broad expression of (A) Alcam throughout the DA neurogenic zone relative to (B) Corin, which has a more discrete pattern of expression close to the midline. (C) TH is also included in the merged image in D for context. (Scale bar: 50  $\mu$ m.)

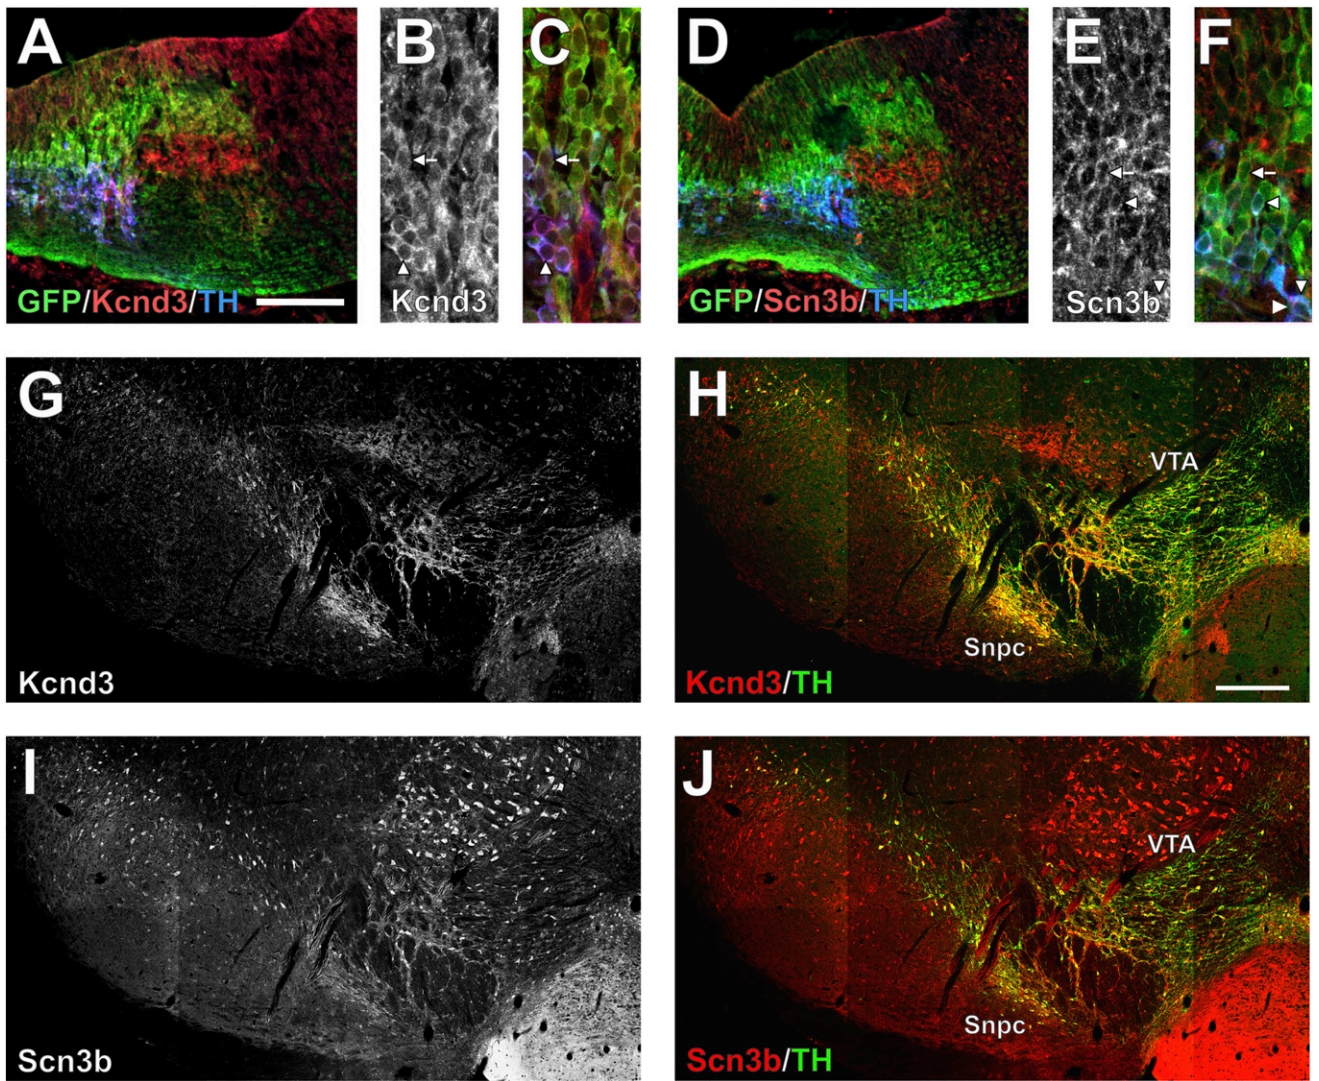

**Fig. S2.** Expression of transmembrane ion channel subunits in the developing and adult midbrain. Coronal section through the E12.5 *Ngn2*-GFP mouse VM shows that (A–C) Kcnd3 (red) and (D–F) Scn3b (red) were expressed in GFP<sup>pos</sup> neuroblasts in the intermediate zone (arrows in B and E) and persisted in TH<sup>+</sup> (blue) neurons in the mantle zone (arrowheads in B and E). Tiled composite images of adult mouse midbrain showing immunohistochemistry for Kcnd3 and Scn3b (G–J). In the adult mouse midbrain, both Kcnd3 (G) and Scn3b (I) were expressed in TH<sup>+</sup> DA neurons (green in H and J), with stronger expression in the Snpc compared with the VTA neurons. Snpc, Substantia nigra pars compacta; VTA, ventral tegmental area. (Scale bar: A, D, 100  $\mu$ m; G–J, 250  $\mu$ m.)

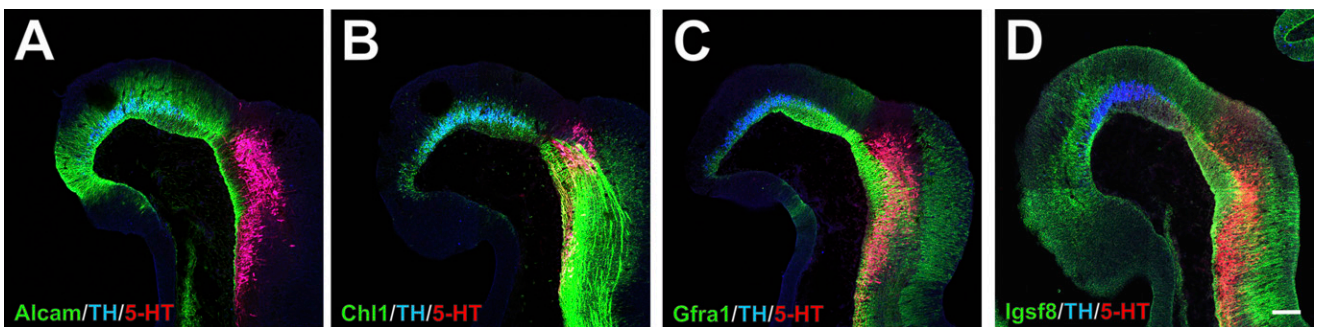

**Fig. S3.** Expression of transmembrane proteins in sagittal sections of the developing mouse VM. Representative images of immunohistochemistry of sagittal mouse E12.5 VM showing the serotonergic domain (5HT<sup>+</sup>; red), dopaminergic domain (TH<sup>+</sup>; blue), and transmembrane protein (A) Alcam, (B) Chl1, (C) Gfra1, and (D) Igsf8 immunoreactivity. (Scale bar: 100  $\mu$ m.)



**A**

| Transplanted Cells | Alcam           | Ch11            | Gfra1           | Igsf8           |
|--------------------|-----------------|-----------------|-----------------|-----------------|
| Positive Fraction  | 24 000<br>(n=4) | 39 144<br>(n=3) | 57 750<br>(n=6) | 57 750<br>(n=3) |
| Negative Fraction  | 67 500<br>(n=4) | 93 200<br>(n=4) | 38 940<br>(n=5) | 38 940<br>(n=3) |

**B**

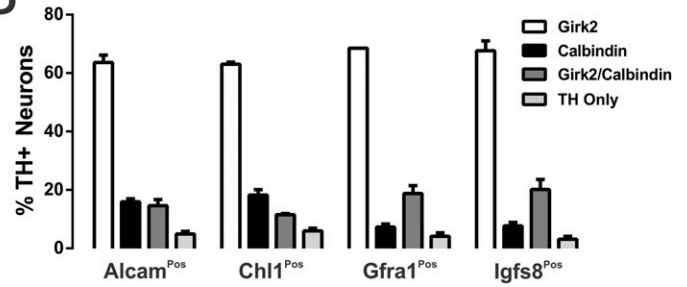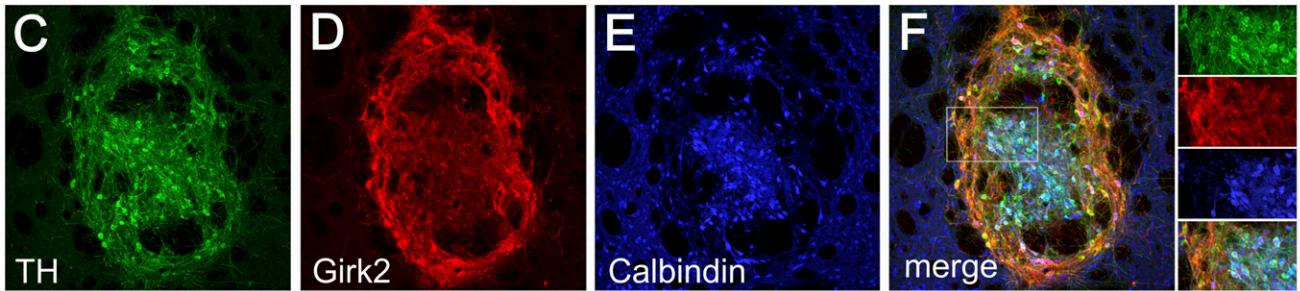

**G**

|                              | Alcam       |             | Ch11        |             | Gfra1       |             | Igsf8       |             |
|------------------------------|-------------|-------------|-------------|-------------|-------------|-------------|-------------|-------------|
|                              | Positive    | Negative    | Positive    | Negative    | Positive    | Negative    | Positive    | Negative    |
| Cells Grafted                | 24 000      | 67 500      | 39 144      | 93 200      | 57 750      | 38 940      | 57 750      | 38 940      |
| TH <sup>+</sup> (% grafted)  | 1.52 ± 0.49 | 0.05 ± 0.01 | 1.10 ± 0.44 | 0.37 ± 0.12 | 0.58 ± 0.19 | 0.08 ± 0.01 | 0.73 ± 0.27 | 0.13 ± 0.06 |
| 5HT <sup>+</sup> (% grafted) | 0.29 ± 0.09 | 0.26 ± 0.05 | 0.24 ± 0.09 | 0.36 ± 0.06 | 0.06 ± 0.01 | 0.51 ± 0.07 | 0.10 ± 0.04 | 0.07 ± 0.04 |

**Fig. 54.** Overview of grafting parameters and DA subtype analysis of FACS-sorted grafts. **A** shows the number of animals and the number of cells transplanted per animal in each group for histological analysis after FACS sorting of E14.5 rat VM (corresponds to data in Fig. 4). **B** The average ( $\pm$  SEM) number of TH<sup>+</sup>/Girk2<sup>+</sup> (A9), TH<sup>+</sup>/Calbindin<sup>+</sup> (A10), TH<sup>+</sup>/Girk2<sup>+</sup>/Calbindin<sup>+</sup>, or TH<sup>+</sup> (TH only) neurons shown as a percentage of the total number of TH<sup>+</sup> neurons 4 wk after transplantation (only groups from positive cell fractions are included; many of the negative cell fraction groups had insufficient TH<sup>+</sup> numbers for quantification). **C** TH<sup>+</sup>, **D** Girk2<sup>+</sup>, **E** Calbindin<sup>+</sup>, and **F** the merged image in a representative graft from the Alcam<sup>Pos</sup> group show a typical mixed composition of Girk2<sup>+</sup> and Calbindin<sup>+</sup> cell types 6 wk after transplantation. **F, Inset** shows a magnified region of the graft and illustrates the mixed A9 (Girk2<sup>+</sup>) and A10 (Calbindin<sup>+</sup>) composition, with the A9 neurons located primarily through the graft periphery and A10 neurons located in the graft center. **G** Table showing the number of cells grafted for each group and the average percentage ( $\pm$  SEM) of TH<sup>+</sup> or 5HT<sup>+</sup> neurons as a fraction of total cells grafted 4 wk after transplantation (corresponds to data in Fig. 4).

**Table S1. The full list of significantly changed genes in the *Ngn2*-GFP<sup>Pos</sup> population relative to the *Lmx1a*-GFP<sup>Neg</sup> reference population**

| UGRepAcc                                   | Symbol        | Name                                                                                          | Fold change | P value |
|--------------------------------------------|---------------|-----------------------------------------------------------------------------------------------|-------------|---------|
| Genes up-regulated in Ngn2-GFP-positive VM |               |                                                                                               |             |         |
| NM_029529                                  | Slc35d3       | Solute carrier family 35, member D3                                                           | 27.64       | 0.00000 |
| NM_009377                                  | Th            | Tyrosine hydroxylase                                                                          | 22.63       | 0.00002 |
| NM_033652                                  | Lmx1a         | LIM homeobox transcription factor 1 $\alpha$                                                  | 19.10       | 0.00000 |
| NM_172870                                  | Bnc2          | Basonuclin 2                                                                                  | 13.93       | 0.00000 |
| NM_172870                                  | 4930563E18Rik | RIKEN cdna 4930563E18 gene                                                                    | 13.10       | 0.00403 |
| NM_172815                                  | Rspo2         | R-spondin 2 homolog ( <i>Xenopus laevis</i> )                                                 | 11.76       | 0.00000 |
| NM_001009978                               | Pde1a         | Phosphodiesterase 1A, calmodulin-dependent                                                    | 11.67       | 0.00011 |
| NM_145377                                  | Trim41        | Tripartite motif-containing 41                                                                | 9.62        | 0.00514 |
| NM_001122756                               | Corin         | Corin                                                                                         | 9.12        | 0.00063 |
| NM_023815                                  | Trp53rk       | Transformation-related protein 53-regulating kinase                                           | 8.91        | 0.02114 |
| NM_001198808                               | Sfmbt2        | Scm-like with four mbt domains 2                                                              | 8.44        | 0.00236 |
| NM_146260                                  | Tmie          | Transmembrane inner ear                                                                       | 8.31        | 0.00775 |
| NM_175647                                  | Dmrta1        | Doublesex and mab-3-related transcription factor-like family A1                               | 7.07        | 0.00033 |
| NM_175647                                  | A930009L07Rik | RIKEN cdna A930009L07 gene                                                                    | 6.96        | 0.00000 |
| NM_009655                                  | Alcam         | Activated leukocyte cell adhesion molecule                                                    | 6.65        | 0.00001 |
| NM_001081656                               | Neur1b        | Neuralized homolog 1b ( <i>Drosophila</i> )                                                   | 6.25        | 0.00033 |
| NM_025696                                  | Sorcs3        | Sortilin-related VPS10 domain containing receptor 3                                           | 6.16        | 0.00396 |
| NM_001139509                               | Nr4a2         | Nuclear receptor subfamily 4, group A, member 2                                               | 6.16        | 0.00000 |
| NM_001163741                               | 1110021J02Rik | RIKEN cdna 1110021J02 gene                                                                    | 6.02        | 0.00780 |
| NM_001109753                               | Sv2b          | Synaptic vesicle glycoprotein 2 b                                                             | 5.88        | 0.00006 |
| NM_001159317                               | Il1rap        | IL-1 receptor accessory protein                                                               | 5.83        | 0.00004 |
| NM_001159317                               | Micalcl       | MICAL C-terminal-like                                                                         | 5.53        | 0.00024 |
| NM_001042451                               | Snca          | Synuclein, $\alpha$                                                                           | 5.40        | 0.00000 |
| NM_001039347                               | Kcnd3         | Potassium voltage-gated channel, Shal-related family, member 3                                | 5.36        | 0.00128 |
| NM_019626                                  | Cbln1         | Cerebellin 1 precursor protein                                                                | 5.36        | 0.00000 |
| NM_001080780                               | Ret           | Ret proto-oncogene                                                                            | 5.16        | 0.00000 |
| NM_001079847                               | Gpr64         | G protein-coupled receptor 64                                                                 | 5.12        | 0.01411 |
| NM_001079847                               | Gm2694        | Predicted gene 2694                                                                           | 4.85        | 0.00013 |
| NM_001085373                               | Mcc           | Mutated in colorectal cancers                                                                 | 4.78        | 0.00397 |
| NM_001085373                               | C130021I20Rik | Riken cdna C130021I20 gene                                                                    | 4.56        | 0.00000 |
| NM_153509                                  | AF529169      | Cdna sequence AF529169                                                                        | 4.49        | 0.00077 |
| NM_001099635                               | Myh3          | Myosin, heavy polypeptide 3, skeletal muscle, embryonic                                       | 4.42        | 0.01942 |
| NM_009525                                  | Wnt5b         | Wingless-related MMTV integration site 5B                                                     | 4.42        | 0.00039 |
| NM_001101640                               | Tmem207       | Transmembrane protein 207                                                                     | 4.09        | 0.03664 |
| NM_134130                                  | Abhd3         | Abhydrolase domain containing 3                                                               | 3.94        | 0.00155 |
| NM_013646                                  | Rora          | RAR-related orphan receptor- $\alpha$                                                         | 3.65        | 0.00289 |
| NM_175631                                  | Cbln4         | Cerebellin 4 precursor protein                                                                | 3.51        | 0.00007 |
| NM_053255                                  | Elac1         | Elac homolog 1 ( <i>Escherichia coli</i> )                                                    | 3.48        | 0.02543 |
| NM_053105                                  | Klhl1         | Kelch-like 1 ( <i>Drosophila</i> )                                                            | 3.40        | 0.00003 |
| NM_011947                                  | Map3k3        | Mitogen-activated protein kinase kinase kinase 3                                              | 3.40        | 0.01820 |
| NM_001081035                               | Nav3          | Neuron navigator 3                                                                            | 3.38        | 0.00013 |
| NM_026791                                  | Fbxw9         | F-box and WD-40 domain protein 9                                                              | 3.38        | 0.03154 |
| NM_011978                                  | Slc27a2       | Solute carrier family 27 (fatty acid transporter), member 2                                   | 3.35        | 0.00156 |
| NM_018884                                  | Pdzrn3        | PDZ domain containing RING finger 3                                                           | 3.30        | 0.00003 |
| NM_001168684                               | Tmcc3         | Transmembrane and coiled coil domains 3                                                       | 3.27        | 0.00060 |
| NM_175314                                  | Adamts9       | A disintegrin-like and metallopeptidase (reprolysin type) with thrombospondin type 1 motif, 9 | 3.25        | 0.00040 |
| NM_029337                                  | Ep400         | E1A-binding protein p400                                                                      | 3.25        | 0.01103 |
| NM_010637                                  | Klf4          | Kruppel-like factor 4 (gut)                                                                   | 3.25        | 0.00001 |
| NM_178915                                  | Tmem179       | Transmembrane protein 179                                                                     | 3.20        | 0.01769 |
| NM_001163755                               | Skor1         | SKI family transcriptional corepressor 1                                                      | 3.15        | 0.00017 |
| NM_008566                                  | Mcm5          | Minichromosome maintenance-deficient 5, cell division cycle 46 ( <i>S. cerevisiae</i> )       | 3.01        | 0.00817 |
| NM_020606                                  | Parva         | Parvin, $\alpha$                                                                              | 2.94        | 0.00519 |
| NM_010279                                  | Gfra1         | Glial cell line derived neurotrophic factor family receptor- $\alpha$ 1                       | 2.92        | 0.00002 |
| NM_144557                                  | Myrip         | Myosin VIIA and Rab interacting protein                                                       | 2.92        | 0.00019 |
| NM_178804                                  | Slit2         | Slit homolog 2 ( <i>Drosophila</i> )                                                          | 2.89        | 0.00026 |
| NM_001110843                               | Cacna2d1      | Calcium channel, voltage-dependent, $\alpha$ 2 $\delta$ -subunit 1                            | 2.89        | 0.00069 |
| NM_138649                                  | Syt17         | Synaptotagmin XVII                                                                            | 2.89        | 0.00672 |
| NM_007697                                  | Chl1          | Cell adhesion molecule with homology to L1CAM                                                 | 2.87        | 0.00025 |
| NM_001164086                               | Homer2        | Homer homolog 2 ( <i>Drosophila</i> )                                                         | 2.85        | 0.00003 |

Table S1. Cont.

| UGRepAcc     | Symbol        | Name                                                                                              | Fold change | P value |
|--------------|---------------|---------------------------------------------------------------------------------------------------|-------------|---------|
| NM_010750    | Mab2111       | Mab-21-like 1 ( <i>C. elegans</i> )                                                               | 2.83        | 0.00297 |
| NM_001162904 | Mdm1          | Transformed mouse 3T3 cell double minute 1                                                        | 2.83        | 0.00331 |
| NM_011040    | Pax8          | Paired box gene 8                                                                                 | 2.81        | 0.02377 |
| NM_001080969 | Thg11         | Trna-histidine guanylyltransferase 1-like ( <i>S. cerevisiae</i> )                                | 2.79        | 0.00175 |
| NM_152895    | Kdm5b         | Lysine (K)-specific demethylase 5B                                                                | 2.76        | 0.00031 |
| NM_011074    | Cdk14         | Cyclin-dependent kinase 14                                                                        | 2.72        | 0.00186 |
| NM_011074    | 1700093J21Rik | RIKEN cdna 1700093J21 gene                                                                        | 2.70        | 0.02035 |
| NM_010095    | Ebf2          | Early B-cell factor 2                                                                             | 2.68        | 0.00007 |
| NM_010572    | Irs4          | Insulin receptor substrate 4                                                                      | 2.66        | 0.00662 |
| NM_011416    | Smarca2       | SWI/SNF related, matrix-associated, actin-dependent regulator of chromatin, subfamily a, member 2 | 2.62        | 0.00030 |
| NM_001145888 | Zfat          | Zinc finger and AT hook domain containing                                                         | 2.62        | 0.00821 |
| NM_001190703 | Dlk1          | $\delta$ -Like 1 homolog ( <i>Drosophila</i> )                                                    | 2.60        | 0.00487 |
| NM_001190703 | 1700013G23Rik | RIKEN cdna 1700013G23 gene                                                                        | 2.60        | 0.02167 |
| NM_031998    | Tsga14        | Testis-specific gene A14                                                                          | 2.58        | 0.01648 |
| NM_207677    | Dedd2         | Death effector domain-containing DNA-binding protein 2                                            | 2.58        | 0.03270 |
| NM_207677    | 2700029L08Rik | RIKEN cdna 2700029L08 gene                                                                        | 2.58        | 0.00034 |
| NM_201518    | Flrt2         | Fibronectin leucine-rich transmembrane protein 2                                                  | 2.56        | 0.00015 |
| NM_001163610 | Nhs12         | NHS-like 2                                                                                        | 2.56        | 0.01881 |
| NM_008102    | Gch1          | GTP cyclohydrolase 1                                                                              | 2.54        | 0.00002 |
| NM_080419    | Igsf8         | Ig superfamily, member 8                                                                          | 2.52        | 0.00391 |
| NM_010878    | Nck1          | Noncatalytic region of tyrosine kinase adaptor protein 1                                          | 2.50        | 0.00630 |
| NM_001113545 | Lima1         | LIM domain and actin-binding 1                                                                    | 2.48        | 0.00657 |
| NM_020287    | Insm2         | Insulinoma-associated 2                                                                           | 2.48        | 0.01472 |
| NM_013790    | Abcc5         | ATP-binding cassette, subfamily C (CFTR/MRP), member 5                                            | 2.46        | 0.00307 |
| NM_001101488 | Gsg1l         | GSG1-like                                                                                         | 2.46        | 0.01013 |
| NM_007701    | Vsx2          | Visual system homeobox 2                                                                          | 2.46        | 0.01828 |
| NM_080728    | Myh7          | Myosin, heavy polypeptide 7, cardiac muscle, $\beta$                                              | 2.44        | 0.00498 |
| NM_001163640 | Chn2          | Chimerin (chimaerin) 2                                                                            | 2.44        | 0.01999 |
| NM_016886    | Gria3         | Glutamate receptor, ionotropic, AMPA3 ( $\alpha$ 3)                                               | 2.44        | 0.00011 |
| NM_018741    | Igfbp1        | Insulin-like growth factor-binding protein-like 1                                                 | 2.42        | 0.00116 |
| NM_001024955 | Pik3r1        | Phosphatidylinositol 3-kinase, regulatory subunit, polypeptide 1 (p85 $\alpha$ )                  | 2.42        | 0.01385 |
| NM_172260    | Cep68         | Centrosomal protein 68                                                                            | 2.42        | 0.01286 |
| NM_001145820 | Gpd2          | Glycerol phosphate dehydrogenase 2, mitochondrial                                                 | 2.42        | 0.00043 |
| NM_009829    | Ccnd2         | Cyclin D2                                                                                         | 2.41        | 0.00468 |
| NM_001142411 | Zfp937        | Zinc finger protein 937                                                                           | 2.41        | 0.04674 |
| NM_001077403 | Nrp2          | Neuropilin 2                                                                                      | 2.39        | 0.00006 |
| NM_001077403 | 5930412G12Rik | RIKEN cdna 5930412G12 gene                                                                        | 2.39        | 0.02531 |
| NM_013873    | Sult4a1       | Sulfotransferase family 4A, member 1                                                              | 2.39        | 0.00191 |
| NM_001122758 | Pcdh7         | Protocadherin 7                                                                                   | 2.33        | 0.00345 |
| NM_001039371 | Slc22a15      | Solute carrier family 22 (organic anion/cation transporter), member 15                            | 2.33        | 0.00240 |
| NM_001081280 | Nlrc3         | NLR family, CARD domain containing 3                                                              | 2.33        | 0.00227 |
| NM_001164620 | Ccdc157       | Coiled-coil domain containing 157                                                                 | 2.33        | 0.00164 |
| NM_001083917 | Scn3b         | Sodium channel, voltage-gated, type III, $\beta$                                                  | 2.30        | 0.00501 |
| NM_001029850 | Magi1         | Membrane associated guanylate kinase, WW and PDZ domain containing 1                              | 2.26        | 0.00016 |
| NM_009640    | Angpt1        | Angiopoietin 1                                                                                    | 2.26        | 0.02225 |
| NM_001033253 | Plekhg1       | Pleckstrin homology domain containing, family G (with rhogef domain) member 1                     | 2.26        | 0.00444 |
| NM_001252572 | Cttn          | Cortactin                                                                                         | 2.24        | 0.02811 |
| NM_172592    | Srek1         | Splicing regulatory glutamine/lysine-rich protein 1                                               | 2.24        | 0.00135 |
| NM_016801    | Stx1a         | Syntaxin 1A (brain)                                                                               | 2.24        | 0.00158 |
| NM_173437    | Nav1          | Neuron navigator 1                                                                                | 2.21        | 0.00649 |
| NM_011855    | Odz1          | Odd Oz/ten-m homolog 1 ( <i>Drosophila</i> )                                                      | 2.21        | 0.01258 |
| NM_001114541 | Fam113a       | Family with sequence similarity 113, member A                                                     | 2.21        | 0.00120 |
| NM_013813    | Epb4.1l3      | Erythrocyte protein band 4.1-like 3                                                               | 2.19        | 0.00270 |
| NM_053144    | Pcdhb19       | Protocadherin $\beta$ 19                                                                          | 2.19        | 0.03557 |
| NM_027782    | Kctd6         | Potassium channel tetramerisation domain containing 6                                             | 2.18        | 0.00029 |
| NM_177271    | Samd5         | Sterile $\alpha$ -motif domain containing 5                                                       | 2.18        | 0.00007 |
| NM_010725    | Lmx1b         | LIM homeobox transcription factor 1 $\beta$                                                       | 2.16        | 0.00070 |

Table S1. Cont.

| UGRepAcc                | Symbol        | Name                                                                                    | Fold change | P value |
|-------------------------|---------------|-----------------------------------------------------------------------------------------|-------------|---------|
| NM_026623               | Nudt21        | Nudix (nucleoside diphosphate-linked moiety X)-type motif 21                            | 2.14        | 0.04953 |
| NM_173016               | Vat1l         | Vesicle amine transport protein 1 homolog-like ( <i>T. californica</i> )                | 2.14        | 0.00049 |
| NM_001033172            | Rab11fip2     | RAB11 family-interacting protein 2 (class I)                                            | 2.14        | 0.01292 |
| NM_011636               | Plscr1        | Phospholipid scramblase 1                                                               | 2.13        | 0.00020 |
| NM_145129               | Chrna3        | Cholinergic receptor, nicotinic, $\alpha$ -polypeptide 3                                | 2.11        | 0.00340 |
| NM_001163348            | Ntng1         | Netrin G1                                                                               | 2.09        | 0.00020 |
| NM_080853               | Slc17a6       | Solute carrier family 17 (sodium-dependent inorganic phosphate cotransporter), member 6 | 2.09        | 0.00256 |
| NM_177753               | Sox21         | SRY-box containing gene 21                                                              | 2.09        | 0.00706 |
| NM_080288               | Elmo1         | Engulfment and cell motility 1, ced-12 homolog ( <i>C. elegans</i> )                    | 2.08        | 0.00059 |
| NM_007792               | Csrp2         | Cysteine and glycine-rich protein 2                                                     | 2.08        | 0.02040 |
| NM_172665               | Pdk1          | Pyruvate dehydrogenase kinase, isoenzyme 1                                              | 2.06        | 0.01696 |
| NM_139228               | Rhbdl3        | Rhomboid, veinlet-like 3 ( <i>Drosophila</i> )                                          | 2.06        | 0.02957 |
| NM_001244891            | Celf1         | CUGBP, Elav-like family member 1                                                        | 2.06        | 0.00896 |
| NM_008651               | Mybl1         | Myeloblastosis oncogene-like 1                                                          | 2.06        | 0.02371 |
| NM_178873               | Adck2         | Aarf domain containing kinase 2                                                         | 2.05        | 0.00070 |
| NM_001025559            | Sox6          | SRY-box containing gene 6                                                               | 2.05        | 0.00144 |
| NM_001198811            | Frem1         | Fras1 related extracellular matrix protein 1                                            | 2.03        | 0.00394 |
| NM_010860               | Myl6          | Myosin, light polypeptide 6, alkali, smooth muscle and nonmuscle                        | 2.03        | 0.02281 |
| NM_008847               | Pip5k1a       | Phosphatidylinositol-4-phosphate 5-kinase, type 1 $\alpha$                              | 2.03        | 0.00220 |
| NM_001042607            | Ryk           | Receptor-like tyrosine kinase                                                           | 2.03        | 0.01915 |
| NM_007930               | Enc1          | Ectodermal-neural cortex 1                                                              | 2.03        | 0.02363 |
| NM_008259               | Foxa1         | Forkhead box A1                                                                         | 2.03        | 0.00077 |
| NM_001037877            | Tcf25         | Transcription factor 25 (basic helix-loop-helix)                                        | 2.03        | 0.01133 |
| NM_178118               | Dixdc1        | DIX domain containing 1                                                                 | 2.02        | 0.00576 |
| NM_172523               | Slc18a2       | Solute carrier family 18 (vesicular monoamine), member 2                                | 2.02        | 0.00133 |
| NM_001166661            | Ccdc85a       | Coiled-coil domain containing 85A                                                       | 2.02        | 0.00015 |
| NM_153168               | Lars2         | Leucyl-trna synthetase, mitochondrial                                                   | 2.02        | 0.01478 |
| NM_139272               | Galnt2        | UDP-N-acetyl- $\alpha$ -D-galactosamine:polypeptide N-acetylgalactosaminyltransferase 2 | 2.02        | 0.01662 |
| Genes down-regulated in |               |                                                                                         |             |         |
| Ngn2-GFP-positive VM    |               |                                                                                         |             |         |
| NM_008219               | Hbb-bh1       | Hemoglobin Z, $\beta$ -like embryonic chain                                             | -270.18     | 0.00005 |
| NM_010405               | Hba-x         | Hemoglobin X, $\alpha$ -like embryonic chain in Hba complex                             | -87.09      | 0.00014 |
| NM_133245               | Ahsp          | $\alpha$ -Hemoglobin stabilizing protein                                                | -68.07      | 0.00000 |
| NM_019467               | Aif1          | Allograft inflammatory factor 1                                                         | -56.15      | 0.00899 |
| NM_008221               | Hbb-y         | Hemoglobin Y, $\beta$ -like embryonic chain                                             | -52.79      | 0.00001 |
| NM_001037859            | Csf1r         | Colony stimulating factor 1 receptor                                                    | -52.79      | 0.00003 |
| NM_172621               | Clic5         | Chloride intracellular channel 5                                                        | -40.63      | 0.00005 |
| NM_010745               | Ly86          | Lymphocyte antigen 86                                                                   | -38.50      | 0.00002 |
| NM_010686               | Laptm5        | Lysosomal-associated protein transmembrane 5                                            | -38.20      | 0.00000 |
| NM_011403               | Slc4a1        | Solute carrier family 4 (anion exchanger), member 1                                     | -33.26      | 0.00000 |
| NM_021281               | Ctss          | Cathepsin S                                                                             | -32.75      | 0.00007 |
| NM_016956               | Hbb-b2        | Hemoglobin, $\beta$ -adult minor chain                                                  | -29.18      | 0.00003 |
| NM_009777               | C1qb          | Complement component 1, q subcomponent, $\beta$ -polypeptide                            | -26.81      | 0.00001 |
| NM_153111               | Fev           | FEV (ETS oncogene family)                                                               | -25.20      | 0.00003 |
| NM_001142952            | Fam46c        | Family with sequence similarity 46, member C                                            | -23.70      | 0.00042 |
| NM_009707               | Arhgap6       | Rho gtpase activating protein 6                                                         | -22.80      | 0.00000 |
| NM_007651               | Cd53          | CD53 antigen                                                                            | -20.16      | 0.00060 |
| NM_011662               | Tyropb        | TYRO protein tyrosine kinase-binding protein                                            | -19.40      | 0.00000 |
| NM_011662               | Six3os1       | Six3 opposite strand transcript 1                                                       | -17.41      | 0.00077 |
| NM_173391               | Tph2          | Tryptophan hydroxylase 2                                                                | -15.16      | 0.00187 |
| NM_029767               | Rps9          | Ribosomal protein S9                                                                    | -14.04      | 0.00000 |
| NM_024435               | Nts           | Neurotensin                                                                             | -13.61      | 0.00000 |
| NM_024435               | Pisd-ps3      | Phosphatidylserine decarboxylase, pseudogene 3                                          | -12.90      | 0.00002 |
| NM_030143               | Ddit4l        | DNA-damage-inducible transcript 4-like                                                  | -12.22      | 0.00007 |
| NM_001001796            | Prrxl1        | Paired related homeobox protein-like 1                                                  | -10.97      | 0.00001 |
| NM_001077632            | Nkx2-2        | NK2 transcription factor related, locus 2 ( <i>Drosophila</i> )                         | -10.24      | 0.00000 |
| NM_026358               | 4930583H14Rik | RIKEN cDNA 4930583H14 gene                                                              | -9.55       | 0.00067 |
| NM_001136072            | Meis2         | Meis homeobox 2                                                                         | -9.48       | 0.00000 |
| NM_010484               | Slc6a4        | Solute carrier family 6 (neurotransmitter transporter, serotonin), member 4             | -9.33       | 0.00001 |

Table S1. Cont.

| UGRepAcc     | Symbol        | Name                                                            | Fold change | P value |
|--------------|---------------|-----------------------------------------------------------------|-------------|---------|
| NM_011381    | Six3          | Sine oculis-related homeobox 3 homolog ( <i>Drosophila</i> )    | -8.77       | 0.00000 |
| NM_009317    | Tal2          | T-cell acute lymphocytic leukemia 2                             | -8.38       | 0.00047 |
| NM_029770    | Unc5b         | Unc-5 homolog B ( <i>C. elegans</i> )                           | -8.00       | 0.00000 |
| NM_001033415 | Shisa3        | Shisa homolog 3 ( <i>Xenopus laevis</i> )                       | -7.64       | 0.00001 |
| NM_001042613 | Sepp1         | Selenoprotein P, plasma, 1                                      | -6.91       | 0.00326 |
| NM_030707    | Fcrls         | Fc receptor-like 5, scavenger receptor                          | -6.50       | 0.01040 |
| NM_001029841 | Sla           | Src-like adaptor                                                | -5.79       | 0.00044 |
| NM_010821    | Mpeg1         | Macrophage-expressed gene 1                                     | -5.20       | 0.00943 |
| NM_009801    | Car2          | Carbonic anhydrase 2                                            | -5.12       | 0.00000 |
| NM_007739    | Col8a1        | Collagen, type VIII, $\alpha$ 1                                 | -5.04       | 0.00002 |
| NM_009123    | Nkx1-2        | NK1 transcription factor related, locus 2 ( <i>Drosophila</i> ) | -5.04       | 0.00023 |
| NM_001103177 | Ablim1        | Actin-binding LIM protein 1                                     | -5.00       | 0.00483 |
| NM_001005477 | Barhl2        | Barh-like 2 ( <i>Drosophila</i> )                               | -4.92       | 0.00077 |
| NM_021459    | Isl1          | ISL1 transcription factor, LIM/homeodomain                      | -4.49       | 0.00691 |
| NM_001252530 | Slco2b1       | Solute carrier organic anion transporter family, member 2b1     | -4.39       | 0.00039 |
| NM_001025305 | Tfap2b        | Transcription factor AP-2 $\beta$                               | -4.35       | 0.00199 |
| NM_001244198 | Pax6          | Paired box gene 6                                               | -4.22       | 0.00009 |
| NM_001163154 | Etv1          | Ets variant gene 1                                              | -4.19       | 0.00018 |
| NM_007901    | S1pr1         | Sphingosine-1-phosphate receptor 1                              | -4.16       | 0.00036 |
| NM_008888    | Phox2b        | Paired-like homeobox 2b                                         | -4.09       | 0.00627 |
| NM_009447    | Tuba4a        | Tubulin, $\alpha$ 4A                                            | -3.94       | 0.00196 |
| NM_146247    | Mettl2        | Methyltransferase-like 22                                       | -3.82       | 0.00047 |
| NM_026101    | Herc4         | Hect domain and RLD 4                                           | -3.82       | 0.00794 |
| NM_010518    | Igfbp5        | Insulin-like growth factor-binding protein 5                    | -3.51       | 0.00007 |
| NM_001163847 | Tbc1d24       | TBC1 domain family, member 24                                   | -3.51       | 0.00084 |
| NM_001002239 | Rpl17         | Ribosomal protein L17                                           | -3.46       | 0.00860 |
| NM_008090    | Gata2         | GATA-binding protein 2                                          | -3.43       | 0.00002 |
| NM_001135149 | Slc39a8       | Solute carrier family 39 (metal ion transporter), member 8      | -3.35       | 0.01495 |
| NM_133982    | Rpp25         | Ribonuclease P 25 subunit (human)                               | -3.25       | 0.00091 |
| NM_133982    | 2900060N12Rik | RIKEN cdna 2900060N12 gene                                      | -3.25       | 0.00017 |
| NM_018805    | Hs3st3b1      | Heparan sulfate (glucosamine) 3-O-sulfotransferase 3B1          | -3.22       | 0.00016 |
| NM_016798    | Pdlim3        | PDZ and LIM domain 3                                            | -3.20       | 0.00032 |
| NM_009712    | Arsb          | Arylsulfatase B                                                 | -3.17       | 0.00121 |
| NM_012038    | Vsnl1         | Visinin-like 1                                                  | -3.17       | 0.01836 |
| NM_007998    | Fech          | Ferrochelatase                                                  | -3.15       | 0.00013 |
| NM_001136061 | Ednrb         | Endothelin receptor type B                                      | -3.15       | 0.00460 |
| NM_007564    | Zfp3611       | Zinc finger protein 36, C3H type-like 1                         | -3.15       | 0.00496 |
| NM_008091    | Gata3         | GATA-binding protein 3                                          | -3.15       | 0.00001 |
| NM_025831    | 1300014I06Rik | RIKEN cdna 1300014I06 gene                                      | -3.08       | 0.00151 |
| NM_023794    | Etv5          | Ets variant gene 5                                              | -3.03       | 0.00107 |
| NM_026280    | Mxra7         | Matrix remodeling-associated 7                                  | -3.01       | 0.00049 |
| NM_028263    | Fgfbp3        | Fibroblast growth factor-binding protein 3                      | -2.96       | 0.00011 |
| NM_001253719 | Fstl5         | Follistatin-like 5                                              | -2.92       | 0.00132 |
| NM_001039546 | Myo6          | Myosin VI                                                       | -2.89       | 0.00049 |
| NM_011153    | Ppp1r17       | Protein phosphatase 1, regulatory subunit 17                    | -2.87       | 0.01408 |
| NM_021427    | Fam181b       | Family with sequence similarity 181, member B                   | -2.85       | 0.00067 |
| NM_016669    | Crym          | Crystallin, $\mu$                                               | -2.83       | 0.00148 |
| NM_016669    | Gm8350        | Predicted gene 8350                                             | -2.79       | 0.00003 |
| NM_008077    | Gad1          | Glutamate decarboxylase 1                                       | -2.74       | 0.00430 |
| NM_001081286 | Fat1          | FAT tumor suppressor homolog 1 ( <i>Drosophila</i> )            | -2.70       | 0.00426 |
| NM_009233    | Sox1          | SRY box-containing gene 1                                       | -2.68       | 0.01455 |
| NM_023396    | Rprm          | Reprimo, TP53-dependent G2 arrest mediator candidate            | -2.58       | 0.01090 |
| NM_010441    | Hmga2         | High mobility group AT-hook 2                                   | -2.58       | 0.00010 |
| NM_009735    | B2m           | $\beta$ -2 Microglobulin                                        | -2.58       | 0.00532 |
| NM_177290    | Itgb8         | Integrin- $\beta$ 8                                             | -2.56       | 0.00108 |
| NM_008212    | Hadh          | Hydroxyacyl-coa dehydrogenase                                   | -2.50       | 0.01765 |
| NM_008498    | Lhx1          | LIM homeobox protein 1                                          | -2.50       | 0.00148 |
| NM_010833    | Msn           | Moesin                                                          | -2.48       | 0.00072 |
| NM_008716    | Notch3        | Notch gene homolog 3 ( <i>Drosophila</i> )                      | -2.41       | 0.02479 |
| NM_001159516 | Qk            | Quaking                                                         | -2.41       | 0.00091 |
| NM_001171147 | Yap1          | Yes-associated protein 1                                        | -2.39       | 0.01832 |
| NM_001033298 | Plk1s1        | Polo-like kinase 1 substrate 1                                  | -2.39       | 0.00035 |







**Table S2. The list of *Ngn2*-GFP<sup>Pos</sup> up-regulated genes encoding for membrane proteins and their known or predicted location on the membrane**

| UGRepAcc     | Symbol        | Name                                                                                    | Fold change | P value | Membrane location |
|--------------|---------------|-----------------------------------------------------------------------------------------|-------------|---------|-------------------|
| NM_001122756 | Corin         | Corin                                                                                   | 9.12        | 0.00063 | EX                |
| NM_009655    | Alcam         | Activated leukocyte cell adhesion molecule                                              | 6.65        | 0.00001 | EX                |
| NM_001159317 | Il1rap        | IL-1 receptor accessory protein                                                         | 5.83        | 0.00004 | EX                |
| NM_001039347 | Kcnd3         | Potassium voltage-gated channel, Shal-related family, member 3                          | 5.36        | 0.00128 | EX                |
| NM_001080780 | Ret           | Ret proto-oncogene                                                                      | 5.16        | 0.00000 | EX                |
| NM_001079847 | Gpr64         | G protein-coupled receptor 64                                                           | 5.12        | 0.01411 | EX                |
| NM_010279    | Gfra1         | Glial cell line-derived neurotrophic factor family receptor $\alpha$ 1                  | 2.92        | 0.00002 | EX                |
| NM_001110843 | Cacna2d1      | Calcium channel, voltage-dependent, $\alpha$ 2 $\delta$ -subunit 1                      | 2.89        | 0.00069 | EX                |
| NM_007697    | Chl1          | Cell adhesion molecule with homology to L1CAM                                           | 2.87        | 0.00025 | EX                |
| NM_001190703 | Dlk1          | $\delta$ -Like 1 homolog ( <i>Drosophila</i> )                                          | 2.60        | 0.00487 | EX                |
| NM_080419    | Igsf8         | Ig superfamily, member 8                                                                | 2.52        | 0.00391 | EX                |
| NM_001077403 | Nrp2          | Neuropilin 2                                                                            | 2.39        | 0.00006 | EX                |
| NM_001122758 | Pcdh7         | Protocadherin 7                                                                         | 2.33        | 0.00345 | EX                |
| NM_001083917 | Scn3b         | Sodium channel, voltage-gated, type III, $\beta$                                        | 2.30        | 0.00501 | EX                |
| NM_053144    | Pcdhb19       | Protocadherin $\beta$ 19                                                                | 2.19        | 0.03557 | EX                |
| NM_001163348 | Ntng1         | Netrin G1                                                                               | 2.09        | 0.00020 | EX                |
| NM_001198811 | Frem1         | Fras1-related extracellular matrix protein 1                                            | 2.03        | 0.00394 | EX                |
| NM_001042607 | Ryk           | Receptor-like tyrosine kinase                                                           | 2.03        | 0.01915 | EX                |
| NM_146260    | Tmie          | Transmembrane inner ear                                                                 | 8.31        | 0.00775 | PM                |
| NM_020606    | Parva         | Parvin, $\alpha$                                                                        | 2.94        | 0.00519 | PM                |
| NM_001164086 | Homer2        | Homer homolog 2 ( <i>Drosophila</i> )                                                   | 2.85        | 0.00003 | PM                |
| NM_010572    | Irs4          | Insulin receptor substrate 4                                                            | 2.66        | 0.00662 | PM                |
| NM_016886    | Gria3         | Glutamate receptor, ionotropic, AMPA3 ( $\alpha$ 3)                                     | 2.44        | 0.00011 | PM                |
| NM_001029850 | Magi1         | Membrane-associated guanylate kinase, WW and PDZ domain containing 1                    | 2.26        | 0.00016 | PM                |
| NM_011855    | Odz1          | Odd Oz/ten-m homolog 1 ( <i>Drosophila</i> )                                            | 2.21        | 0.01258 | PM                |
| NM_011636    | Plscr1        | Phospholipid scramblase 1                                                               | 2.13        | 0.00020 | PM                |
| NM_145129    | Chrna3        | Cholinergic receptor, nicotinic, $\alpha$ -polypeptide 3                                | 2.11        | 0.00340 | PM                |
| NM_080288    | Elmo1         | Engulfment and cell motility 1, ced-12 homolog ( <i>C. elegans</i> )                    | 2.08        | 0.00059 | PM                |
| NM_008847    | Pip5k1a       | Phosphatidylinositol-4-phosphate 5-kinase, type 1 $\alpha$                              | 2.03        | 0.00220 | PM                |
| NM_178118    | Dixdc1        | DIX domain containing 1                                                                 | 2.02        | 0.00576 | PM                |
| NM_029529    | Slc35d3       | Solute carrier family 35, member D3                                                     | 27.64       | 0.00000 | M                 |
| NM_023815    | Trp53rk       | Transformation-related protein 53-regulating kinase                                     | 8.91        | 0.02114 | M                 |
| NM_025696    | Sorcs3        | Sortilin-related VPS10 domain-containing receptor 3                                     | 6.16        | 0.00396 | M                 |
| NM_001163741 | 1110021J02Rik | RIKEN cDNA 1110021J02 gene                                                              | 6.02        | 0.00780 | M                 |
| NM_001109753 | Sv2b          | Synaptic vesicle glycoprotein 2 b                                                       | 5.88        | 0.00006 | M                 |
| NM_001042451 | Snca          | Synuclein, $\alpha$                                                                     | 5.40        | 0.00000 | M                 |
| NM_153509    | AF529169      | Cdna sequence AF529169                                                                  | 4.49        | 0.00077 | M                 |
| NM_001101640 | Tmem207       | Transmembrane protein 207                                                               | 4.09        | 0.03664 | M                 |
| NM_134130    | Abhd3         | Abhydrolase domain-containing 3                                                         | 3.94        | 0.00155 | M                 |
| NM_011978    | Slc27a2       | Solute carrier family 27 (fatty acid transporter), member 2                             | 3.35        | 0.00156 | M                 |
| NM_001168684 | Tmcc3         | Transmembrane and coiled coil domains 3                                                 | 3.27        | 0.00060 | M                 |
| NM_178915    | Tmem179       | Transmembrane protein 179                                                               | 3.20        | 0.01769 | M                 |
| NM_138649    | Syt17         | Synaptotagmin XVII                                                                      | 2.89        | 0.00672 | M                 |
| NM_011074    | Cdk14         | Cyclin-dependent kinase 14                                                              | 2.72        | 0.00186 | M                 |
| NM_201518    | Flrt2         | Fibronectin leucine-rich transmembrane protein 2                                        | 2.56        | 0.00015 | M                 |
| NM_010878    | Nck1          | Noncatalytic region of tyrosine kinase adaptor protein 1                                | 2.50        | 0.00630 | M                 |
| NM_001113545 | Lima1         | LIM domain and actin binding 1                                                          | 2.48        | 0.00657 | M                 |
| NM_013790    | Abcc5         | ATP-binding cassette, subfamily C (CFTR/MRP), member 5                                  | 2.46        | 0.00307 | M                 |
| NM_001163640 | Chn2          | Chimerin (chimaerin) 2                                                                  | 2.44        | 0.01999 | M                 |
| NM_001145820 | Gpd2          | Glycerol phosphate dehydrogenase 2, mitochondrial                                       | 2.42        | 0.00043 | M                 |
| NM_001039371 | Slc22a15      | Solute carrier family 22 (organic anion/cation transporter), member 15                  | 2.33        | 0.00240 | M                 |
| NM_016801    | Stx1a         | Syntaxin 1A (brain)                                                                     | 2.24        | 0.00158 | M                 |
| NM_013813    | Epb4.1i3      | Erythrocyte protein band 4.1-like 3                                                     | 2.19        | 0.00270 | M                 |
| NM_027782    | Kctd6         | Potassium channel tetramerisation domain containing 6                                   | 2.18        | 0.00029 | M                 |
| NM_080853    | Slc17a6       | Solute carrier family 17 (sodium-dependent inorganic phosphate cotransporter), member 6 | 2.09        | 0.00256 | M                 |
| NM_139228    | Rhbdl3        | Rhomboid, veinlet-like 3 ( <i>Drosophila</i> )                                          | 2.06        | 0.02957 | M                 |
